# Supplementary material for: Biochemical Compounds, Antioxidant Capacity, Leaf Color Profile and Yield of Basil (Ocimum sp.) Microgreens in Floating System
Source: MDPI journal article supplement (doi:10.3390/plants12142652), 2023-07-14
Supplement: s1 [file s1]

**Table S1.** Average annual temperature of the origin of microgreen basil genotypes.

| Cultivar/genotype    | Origins (City, Country)      | AVG of annual temperature (°C) | Classification of climate (Köppen-Geiger) |
|----------------------|------------------------------|--------------------------------|-------------------------------------------|
| Persian Ablagh       | Tabriz, Iran                 | 10.6                           | Csa                                       |
| Dark Opal            | Mansfield, United States     | 10.3                           | Dfa                                       |
| Amethyst Improved    | Genoa, Italy                 | 12.5                           | Cfb                                       |
| Red Rubin            | Copenhagen, Denmark          | 8.9                            | Cfb                                       |
| Italian large leaf   | Milan, Italy                 | 15.8                           | Csa                                       |
| thyrsoflora          | Bangkok, Thailand            | 27.7                           | Aw                                        |
| Cinnamon             | Mexico, Mexico               | 15.9                           | Cwb                                       |
| Persian green basil  | Ahvaz, Iran                  | 26.9                           | BSh                                       |
| Persian purple basil | Ahvaz, Iran                  | 26.9                           | BSh                                       |
| Basilico Rosso       | Andria, Italy                | 17.0                           | Csa                                       |
| Kapoor               | Kapoor, India                | 25.3                           | Cwa                                       |
| lettuce leaf basil   | Tokyo, Japan                 | 15.2                           | Cfa                                       |
| Classic Italiano     | Genoa, Italy                 | 12.5                           | Cfb                                       |
| Genovese             | Genoa, Italy                 | 12.5                           | Cfb                                       |
| Lemon                | New Delhi, India             | 24.6                           | BSh                                       |
| Mobarake             | Isfahan, Iran                | 16.7                           | BWk                                       |
| Clove                | Antananarivo, Madagascar     | 17.9                           | Aw                                        |
| Minimum              | Rimini, Italy                | 15.1                           | Cfa                                       |
| Blue Spice           | Semo Smrzice, Czech Republic | 8.6                            | Cfb                                       |
| Violetto             | Andria, Italy                | 17.0                           | Csa                                       |
| Hoary                | New Delhi, India             | 24.6                           | BSh                                       |

All data are taken from <https://en.climate-data.org>. Cwa = Monsoon-influenced humid subtropical climate, BSh = semiarid climate found in the low latitudes, Csa = Hot-summer Mediterranean climate, Dfa = Hot-summer humid continental climate, Cfb = Temperate oceanic climate or subtropical highland climate, Aw: tropical savanna climate with dry-winter characteristics, Cwb = Subtropical highland climate or Monsoon-influenced temperate oceanic climate, Cfa = Humid subtropical climate, BWk = Cold desert climate.
